# Supplementary material
Source: MDPI journal article supplement (https://www.mdpi.com/2077-0472/14/5/652)
Supplement: s1 [file s1]

## Supplementary material

**Table S1.** Date of fungicide application, type and costs performed on two treated strategies (Routine and DSS) in three crop seasons (2021, 2022 and 2023). DAE: days after emergence.

| 2021                     |     |              |                                        |         |                  |              |
|--------------------------|-----|--------------|----------------------------------------|---------|------------------|--------------|
| Date                     | DAE | Product      | Composition                            | Dose/ha | Routine (€/dose) | DSS (€/dose) |
| 24 <sup>th</sup> -Jun    | 15  | Mancolaxyl   | Metalaxyl 85% + Mancozeb 64%           | 3.0 kg  | 32.7             |              |
| 8 <sup>th</sup> -Jul     | 29  | Volare       | Propamocarb 52.5% + Fluopicolide 6.25% | 1.6 L   | 56.7             |              |
| 12 <sup>th</sup> -Jul    | 33  | Valbon       | Benthiavalicarb 1.75% +Mancozeb 70%    | 1.8 kg  |                  | 36.0         |
| 23 <sup>rd</sup> -Jul    | 44  | Xanilo       | Cymoxanil 45%                          | 0.27 kg | 27.0             |              |
|                          |     | Volare       | Propamocarb 52.5% + Fluopicolide 6.25% | 1.6 L   | 56.7             |              |
| 30 <sup>st</sup> -Jul    | 51  | Volare       | Propamocarb 52.5% + Fluopicolide 6.25% | 1.6 L   |                  | 56.7         |
| 4 <sup>th</sup> -Aug     | 56  | Equation pro | Cymoxanil 30% + Famoxadone 22.5%       | 0.4 kg  | 33.4             |              |
|                          |     | Asbelto      | Dimetomorf 50%                         | 0.5 kg  | 14.7             |              |
| 18 <sup>th</sup> -Aug    | 70  | Milraz pro   | Cymoxanil 33% + Zoxamide 33%           | 0.45 kg | 29.8             | 29.8         |
|                          |     | Asbelto      | Dimetomorph 50%                        | 0.5 kg  | 14.7             |              |
| 4 <sup>th</sup> -Sep     | 87  | Leimay       | Amisulbrom 20%                         | 0.5 L   | 31.5             |              |
| Total (number of sprays) |     |              |                                        |         | 6.0              | 3.0          |
| Total (€)                |     |              |                                        |         | 297.3            | 122.5        |

| 2022                     |     |                |                                         |         |                  |              |
|--------------------------|-----|----------------|-----------------------------------------|---------|------------------|--------------|
| Date                     | DAE | Product        | Composition                             | Dose/ha | Routine (€/dose) | DSS (€/dose) |
| 27 <sup>th</sup> -Jun    | 26  | Axidor         | Propamocarb 33.52% + Cymoxanil 5%       | 2.5 kg  | 52.5             |              |
| 1 <sup>st</sup> -Jul     | 30  | Axidor         | Propamocarb 33.52% + Cymoxanil 5%       | 2.5 kg  |                  | 52.5         |
| 13 <sup>rd</sup> -Jul    | 42  | Enervin top    | Ametoctradin 12% + Metiran 44%          | 2.0 kg  | 49.9             |              |
| 22 <sup>nd</sup> -Jul    | 51  | Enervin top    | Ametoctradin 12% + Metiran 44%          | 2.0 kg  | 49.9             |              |
| 1 <sup>st</sup> -Aug     | 61  | Volare         | Ametoctradin 12% + Metiran 44%          | 1.6 L   | 57.6             | 57.6         |
| 17 <sup>th</sup> -Aug    | 77  | Volare         | Ametoctradin 12% + Metiran 44%          | 1.6 L   | 57.6             |              |
| 29 <sup>th</sup> -Aug    | 89  | Zorvec Endavia | Oxathiapiprolin 3% + Benthiavalicarb 7% | 0.5 L   | 68.7             | 68.7         |
|                          |     | Curzate        | Cymoxanil 60%                           | 0.2 kg  | 16.9             |              |
| 12 <sup>th</sup> -Sep    | 103 | Tizca          | Fluazinam 50%                           | 0.4 L   | 31.30            |              |
| Total (number of sprays) |     |                |                                         |         | 7.0              | 3.0          |
| Total (€)                |     |                |                                         |         | 384.5            | 178.8        |

| 2023                     |     |                |                                                                                      |         |                  |              |
|--------------------------|-----|----------------|--------------------------------------------------------------------------------------|---------|------------------|--------------|
| Date                     | DAE | Product        | Composition                                                                          | Dose/ha | Routine (€/dose) | DSS (€/dose) |
| 16 <sup>th</sup> -Jun    | 26  | Cyclo max      | Metalaxyl-M 2.85% + Cupric hydroxide 21.5%                                           | 3.5 kg  | 52.5             |              |
|                          |     | Xanilo         | Cymoxanil 45%                                                                        | 0.27 kg | 17.8             |              |
| 21 <sup>st</sup> -Jun    | 31  | Axidor         | Cymoxanil 5% + Propamocarb 33.52%                                                    | 2.5 kg  |                  | 71.5         |
| 26 <sup>th</sup> -Jun    | 36  | Axidor         | Cymoxanil 5% + Propamocarb 33.52%                                                    | 2.5 kg  | 71.5             |              |
| 4 <sup>th</sup> -Jul     | 44  | Volare         | Propamocarb hydrochloride 625 g L <sup>-1</sup> + Fluopicolid 62.5 g L <sup>-1</sup> | 1.6 L   | 62.4             |              |
|                          |     | Xanilo         | Cymoxanil 45%                                                                        | 0.27 kg | 17.8             |              |
| 7 <sup>th</sup> -Jul     | 47  | Zorbec Endavia | Benthiavalicarb 7% + Oxathiapiprolin 3%                                              | 0.5 L   |                  | 71.2         |
|                          |     | Xanilo         | Cymoxanil 45%                                                                        | 0.27 kg |                  | 17.8         |
| 12 <sup>th</sup> -Jul    | 52  | Revus          | Mandiopropamid 23.4%                                                                 | 0.5 L   | 51.0             |              |
|                          |     | Xanilo         | Cymoxanil 45%                                                                        | 0.27 kg | 17.8             |              |
| 21 <sup>st</sup> -Jul    | 61  | Axidor         | Cymoxanil 5% + Propamocarb 33.52%                                                    | 2.5 kg  | 71.5             |              |
| 24 <sup>th</sup> -Jul    | 64  | Axidor         | Cymoxanil 5% + Propamocarb 33.52%                                                    | 2.5 kg  |                  | 71.5         |
| 1 <sup>st</sup> -Aug     | 72  | Axidor         | Cymoxanil 5% + Propamocarb 33.52%                                                    | 2.5 kg  | 71.5             |              |
|                          |     | Cimoxate 45    | Cymoxanil 45%                                                                        | 0.27 kg | 15.9             |              |
| 11 <sup>th</sup> -Aug    | 82  | Daramun        | Cyazofamid 10%                                                                       | 0.8 L   |                  | 39.9         |
|                          |     | Cimoxate 45    | Cymoxanil 45%                                                                        | 0.27 kg |                  | 15.9         |
| 16 <sup>th</sup> -Aug    | 87  | Daramun        | Cyazofamid 10%                                                                       | 0.8 L   | 39.9             |              |
|                          |     | Cimoxate 45    | Cymoxanil 45%                                                                        | 0.27 kg | 15.9             |              |
| 25 <sup>th</sup> -Aug    | 96  | Cimoxate Cu    | Cymoxanil 3% + Cuprocalcium sulphate 22.5%                                           | 3.0 kg  | 32.7             |              |
| 31 <sup>st</sup> -Aug    | 102 | Cimoxate Cu    | Cymoxanil 3% + Cuprocalcium sulphate 22.5%                                           | 3.0 kg  | 32.7             |              |
| Total (number of sprays) |     |                |                                                                                      |         | 9.0              | 4.0          |
| Total (€)                |     |                |                                                                                      |         | 571.2            | 288.0        |
